# Supplementary material for: Preparation, characterization and application of double yolk–shell structure magnetic molecularly imprinted polymers for extraction of 17β-estradiol
Source: Royal Society of Chemistry journal article supplement (doi:10.1039/d2nj00237j), 2022-01-01
Supplement: d2nj00237j1.pdf [file d2nj00237j1.pdf]

**Preparation, characterization and application of double yolk-shell  
structure magnetic molecularly imprinted polymers for extraction of  
17 $\beta$ -estradiol**

*Hui Lyu<sup>‡</sup>, Xinze Wu<sup>‡</sup>, Yinpeng Yang, Huaixia Chen\*, Xueping Dang, Xiaolan Liu*

*Collaborative Innovation Center for Advanced Organic Chemical Materials Co-constructed by the  
Province and Ministry, Hubei Ministry-of-Education Key Laboratory for the Synthesis and Application  
of Organic Functional Molecules & College of Chemistry and Chemical Engineering, Hubei University,  
Wuhan 430063, China*

\* Corresponding author. Prof. Huaixia Chen, College of Chemistry and Chemical Engineering, Hubei  
University, Wuhan 430062, China, E-mail: hxch@hubu.edu.cn, Tel: +86 2788662747.

<sup>‡</sup> Both authors contributed equally to this work.

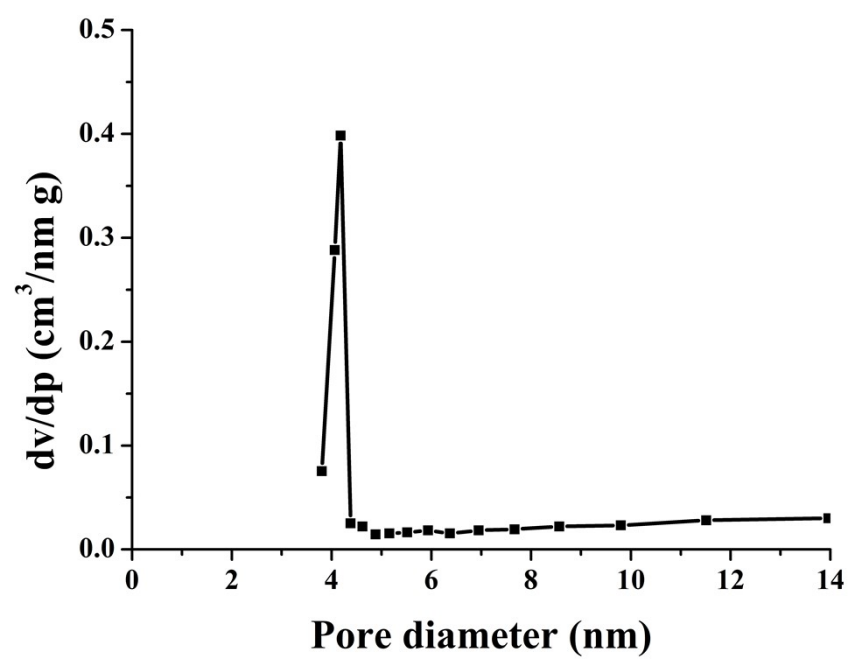

**Fig. S1.** Barret-Joyner-Halenda (BJH) pore size of DYS-MMIPs.

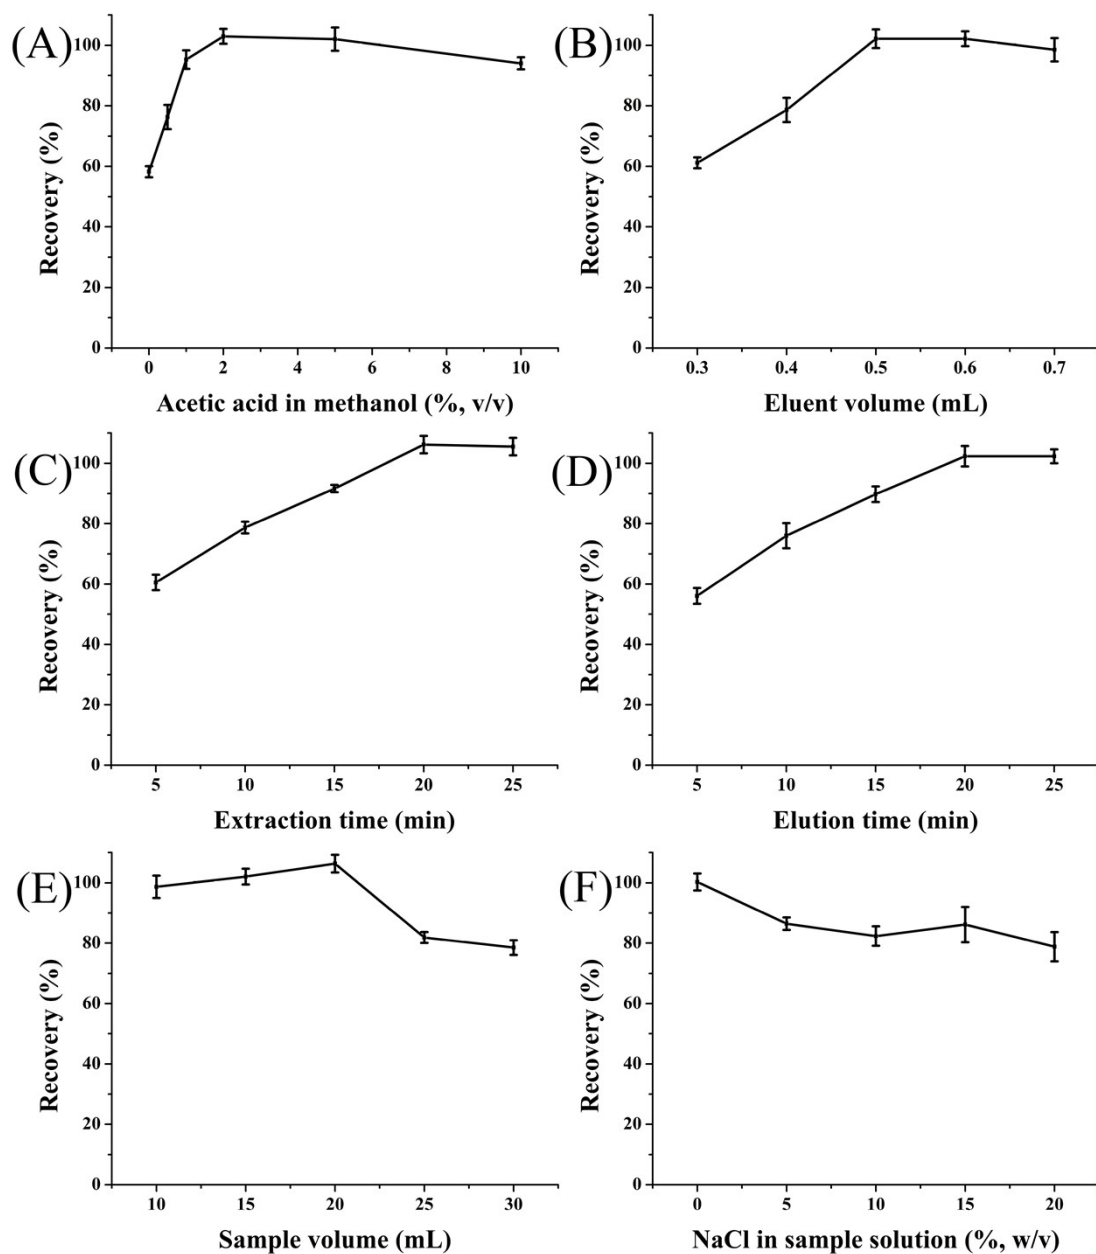

**Fig. S2.** Effect of eluent type (A) and volume (B), extraction (C) and elution (D) time, sample volume (E) and ionic strength (F) on the recovery of E2.

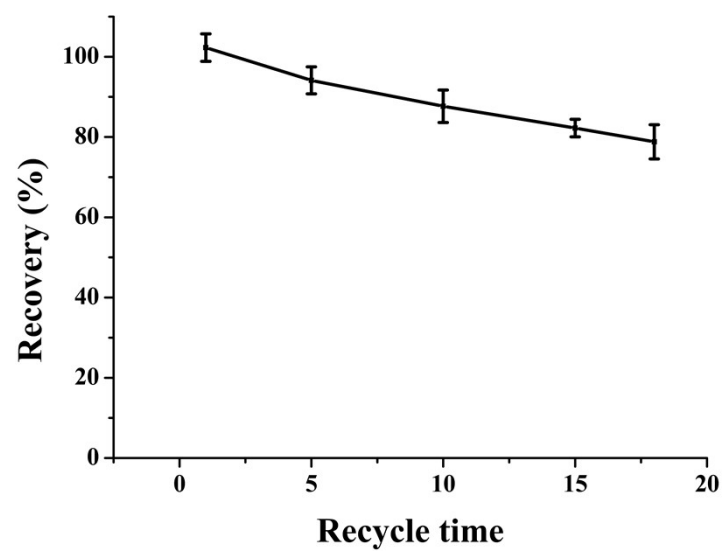

**Fig. S3.** Cyclic life of DYS-MMIPs.

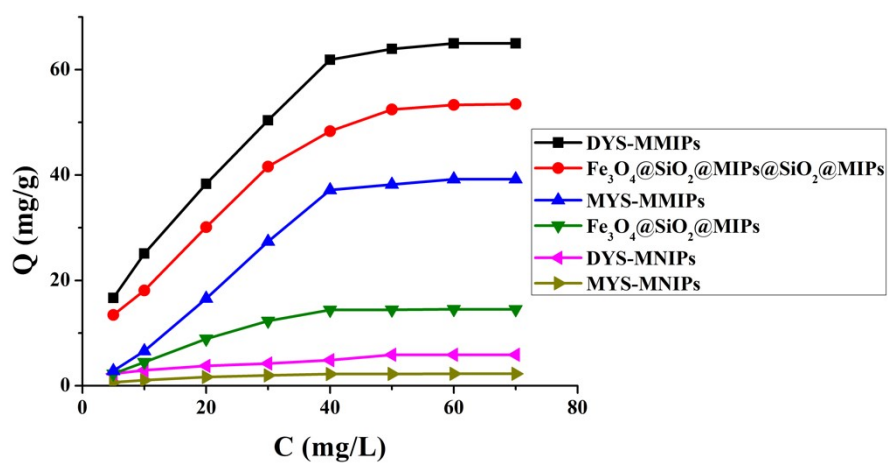

Fig. S4. Binding capacity of DYS-MMIPs.
